# Supplementary material
Source: publisher figshare collection journal article supplement (https://acs.figshare.com/ndownloader/files/17951177)
Supplement: Supplementary file 1 [file 17951177]

## Supporting Information

### Dual-enzyme-Catalyzed Synthesis of Enantiocomplementary Polyesters

Yujing Hu,<sup>†</sup> Yu Zhang,<sup>†</sup> Weihua Xu,<sup>†</sup> Jian Xu,<sup>†</sup> Xianfu Lin,<sup>†</sup> Qi Wu<sup>\*,†</sup>

<sup>†</sup>Department of Chemistry, Zhejiang University, Hangzhou, 310027, People's Republic of China

#### Table of Contents

1. Experimental Section
  - 1.1 Experimental methods
  - 1.2 Computational methods
2. Additional tables and figures
3. <sup>1</sup>H NMR spectra of chiral polyesters.
4. GC data of chiral lactones and optical rotation data
5. References

# 1. Experimental Section

## 1.1 Experimental methods

### *Materials.*

4-methylcyclohexanone, 4-ethylcyclohexanone, 4-propylcyclohexanone, 4-pentylcyclohexanone, 4-phenylcyclohexanone were purchased from Energy-Chemical (China). The lipase immobilized on acrylic resin from *Candida antarctica* (CALB; EC 3.1.1.3,  $\geq 10\,000\text{ U g}^{-1}$ ), and lipozyme®, immobilized from *Mucor miehei* (MML,  $42\text{ U g}^{-1}$ , 1 U corresponds to the amount of enzyme which liberates 1 mol oleic acid at pH 8.0 and 40°C per minute) were purchased from Sigma-Aldrich (Shanghai, China). All solvents and other reagents were analytical grade and used without further purification.

Analytical Methods. Gas chromatographic analyses (GC) was used to analyze the conversion and enantiomeric excess of samples, which was conducted on a Shimadzu GC-1024C chromatograph equipped with a flame ionization detector (FID) and a CP-chirasil-DEX CB 25cm $\times$ 0.25cm column (Agilent). Optical rotation data were measured on a Perkin-Elmer 341 polarimeter equipped with a Na-lamp. The  $^1\text{H}$ NMR spectra were recorded using a Bruker DRX 400 NMR spectrometer (Rheinstetten, Germany) and chemical shifts were expressed in ppm. The number- and weight-average molecular weights ( $M_n$  and  $M_w$ , respectively) of polyesters were measured by gel permeation chromatography (GPC) with a system equipped with a refractive-index detector (Waters 2414) and Waters Styragel GPC columns (Massachusetts, USA). The GPC columns were standardized with narrow-dispersity polystyrene in molecular weights ranging from  $1\times 10^5$  to 162. The mobile phase was THF at a flow rate of  $1.0\text{ mL min}^{-1}$ .

### *Mutant Library Screening.*

The generation of mutant libraries and expression of CHMO<sub>Acineto</sub> variants were performed as the previous work reported<sup>1</sup>. In the whole cell screening protocol, the reaction system contained 1 mL of cell culture (0.1 g wet cell/mL), 4  $\mu\text{L}$  of a stock solution of 0.5 M ketones in acetonitrile and D-glucose (3 equiv.). The mixture in 10 mL of glass tube with a sealed cap was shaken at 200 rpm and 22°C for desymmetrization, and the reaction time is 32 h. The reaction was stopped by adding sodium chloride and the mixture was extracted with 1 mL of ethyl acetate three times. The sample was analyzed by chiral gas chromatographic analyses (GC) (CP-chirasil-DEX CB 25 cm $\times$ 0.25 cm) to determine the conversion and the enantiomeric excess of the residues and products.

### *Identifying the Optimal Concentration of Baeyer–Villiger Oxidation in Biphasic System.*

The reaction system was performed in 10 mL of cell culture (0.1 g wet cell/mL) with different concentrations of ketones and D-glucose (3 equiv.), and 30 mL of organic solvents. The mixture was shaken at 200 rpm and 20°C for 40 h. The reaction was stopped by adding sodium chloride. Samples (1 mL of emulsified reaction mixture) were taken with a pipette and extracted with ethyl acetate three times. The sample was analyzed by chiral GC (CP-chirasil-DEX CB 25 cm $\times$ 0.25 cm) to determine the conversion and the enantiomeric excess of the residues and products.

### *General Procedure for Scaling-up Baeyer–Villiger Oxidation in Biphasic System.*

The scaling-up reaction was performed in 150 mL of cell culture (0.1 g wet cell/mL) with limited concentrations of ketones and D-glucose (3 equiv.), and 450 mL of organic solvents. The mixture was shaken at 20°C. Oxygen supply was increased by fixing a balloon filled with oxygen to a syringe and then passing it through Diaphragm seal shaker. After 40 h, samples (1 mL of emulsified reaction mixture) were taken with a pipette and then extracted with ethyl acetate three times. The samples were detected by GC. If the conversion was not complete, additional fresh cell culture would be added until that the substrate was completely transformed. The reaction was stopped by adding sodium chloride. At the end of the reaction (40 h), the emulsified reaction mixture was added with sodium chloride and additional ethyl acetate, and then shook for another 24h in order to extract all of the remaining product in aqueous medium. Then, the organic solvent was dried with anhydrous magnesium sulfate and then evaporated in vacuum at 40°C. The purified lactones were used for subsequent ring-opening polymerization.

### *General Procedure for Synthesis of the Substituted Chiral Polyesters.*

Lipase CALB and MML were added to a Schlenk tube. The tube was put in a vacuum oven (10 mm Hg) for 12h at 45°C in presence of  $\text{P}_2\text{O}_5$ . The tube was removed from the oven at the atmosphere of nitrogen. The polymerization mixture containing chiral lactones obtained from BV Oxidation, initiator butanol (1:100 molar ratio of lactones), extra dry toluene (1 mL) and dry molecular sieves (3 Å) was stirred at 50°C for 18 hours in nitrogen to remove traces of water. The small-scaling reaction was then started by the addition of quantitative dried lipase CALB under the atmosphere of nitrogen at 80°C for 7 days. The samples were taken out by syringe at intervals and monitored by GC. The large-scaling reaction was started by the addition of quantitative dried lipase CALB (or MML) under the atmosphere of nitrogen at 80°C (or 70°C) for 7 days. Then the enzymatic reaction was stopped by filtration and flushed with dichloromethane. The conversion of monomers was calculated by  $^1\text{H}$  NMR of crude product. The filtrate was concentrated and precipitated from ethyl acetate and *n*-hexane. The isolated yield of polyesters after purification was between 50%-60%. The analysis of purified product was performed by GPC and  $^1\text{H}$  NMR.

## 1.2 Computational methods

The crystal structure of CHMO<sub>Acineto</sub> is not available, so we build a homology model (named as CHMO<sub>homo</sub>) based on the crystal structure of CHMO from *Rhodococcus* sp. strain HI-31 (PDB code: 3GWD), which exhibits 55% sequence similarity and thus would represent the enzyme's substrate scope and degree of selectivity.<sup>2</sup> The CHMO mutants were generated using Discovery Studio (version 2.5). The processes of molecular docking and molecular dynamics were performed as previous work reported.<sup>1</sup>

## 2. Additional tables and figures

**Table S1.** List of Forward and Reverse Primers

| Primers             | Sequence                        |
|---------------------|---------------------------------|
| Forward L435A       | GTTTACCAACGCTCCGCCATCAATTG      |
| Forward L435C       | GTTTACCAACTGTCCGCCATCAATTG      |
| Forward L435D       | CCCGTTTACCAACGACCGGCCATCAATTG   |
| Forward L435E       | CCCGTTTACCAACGAGCGGCCATCAATTG   |
| Forward L435G       | GTTTACCAACGGTCCGCCATCAATTG      |
| Forward L435H       | GTTTACCAACCATCCGCCATCAATTG      |
| Forward L435I       | CCCGTTTACCAACATCCCGGCCATCAATTG  |
| Forward L435K       | CCCGTTTACCAACAAACCGGCCATCAATTG  |
| Forward L435F       | GTTTACCAACTTTCCGCCATCAATTG      |
| Forward L435M       | GTTTACCAACATGCCGCCATCAATTG      |
| Forward L435N       | CCCGTTTACCAACAACCGGCCATCAATTG   |
| Forward L435P       | GTTTACCAACCCTCCGCCATCAATTG      |
| Forward L435Q       | CCCGTTTACCAACCAGCGGCCATCAATTG   |
| Forward L435R       | CCCGTTTACCAACCGGCGGCCATCAATTG   |
| Forward L435S       | CCCGTTTACCAACAGCCCGGCCATCAATTG  |
| Forward L435T       | GTTTACCAACACCCCGGCCATCAATTG     |
| Forward L435V       | CCCGTTTACCAACGTGCCGCCATCAATTG   |
| Forward L435W       | GTTTACCAACTGGCGGCCATCAATTG      |
| Forward L435Y       | GTTTACCAACTATCCGCCATCAATTG      |
| Forward F432L       | GAATGGCCCGCTTACCAACCTGCCGCCATCA |
| Forward F432I       | GCTTGGACCGAATGGCCCGATTACCAAC    |
| Forward F432I/L435A | GAATGGCCCGATTACCAACGCGCGGCCATC  |
| Forward F432L/L435A | GAATGGCCCGCTGACCAACGCGCGGCCATC  |
| Forward F432V/L435A | GAATGGCCCGGTGACCAACGCGCGGCCATC  |
| Forward F432M/L435A | GAATGGCCCGATGACCAACGCGCGGCCATC  |

|                           |                                   |
|---------------------------|-----------------------------------|
| Forward F432I/L435G       | GAATGGCCCGATTACCAACGGCCCGCCATC    |
| Forward P431A/F432I/L435A | ACCGAATGGCGCTATTACCAACGCTCCGCCATC |
| Forward P431L/F432I/L435A | ACCGAATGGCCTGATTACCAACGCGCCGCCATC |
| Forward P431F/F432I/L435A | ACCGAATGGCTTTATTACCAACGCGCCGCCATC |
| Forward F432I/T433A/L435A | ACCGAATGGCCCGATTGCGAACGCGCCGCCATC |
| Forward F432I/T433L/L435A | ACCGAATGGCCCGATTCTGAACGCGCCGCCATC |
| Forward F432I/T433I/L435A | ACCGAATGGCCCGATTATTAACGCGCCGCCATC |
| Forward F432I/T433V/L435A | ACCGAATGGCCCGATTGTGAACGCGCCGCCATC |
| Forward F432I/T433M/L435A | ACCGAATGGCCCGATTATGAACGCGCCGCCATC |
| Forward F432I/T433C/L435A | ACCGAATGGCCCGATTTGCAACGCGCCGCCATC |
| Forward F432I/T433S/L435A | ACCGAATGGCCCGATTCTAACGCGCCGCCATC  |
| Silent reverse primer     | GCGGCCGCTCTGGATCCATGC             |

**Table S2.** WT and Single CHMO<sub>Acineto</sub> Mutants as Catalysts in the Desymmetrization of Prochiral Cyclohexanones **1**<sup>[a]</sup>

| entry | substrate | variants | conv.(%) <sup>[b]</sup> | ee <sub>p</sub> (%) <sup>[c]</sup> |
|-------|-----------|----------|-------------------------|------------------------------------|
| 1     | <b>1d</b> | WT       | 99                      | 33(+)                              |
| 2     | <b>1a</b> | F432L    | 99                      | 99( <i>S</i> )                     |
| 3     | <b>1b</b> | F432L    | 99                      | 98( <i>S</i> )                     |
| 4     | <b>1c</b> | F432L    | 99                      | 77( <i>S</i> )                     |
| 5     | <b>1d</b> | F432L    | 99                      | 85(+)                              |
| 6     | <b>1e</b> | F432L    | 99                      | 95(+)                              |
| 7     | <b>1a</b> | F432I    | 99                      | 99( <i>S</i> )                     |
| 8     | <b>1b</b> | F432I    | 99                      | 98( <i>S</i> )                     |
| 9     | <b>1c</b> | F432I    | 99                      | 81( <i>S</i> )                     |
| 10    | <b>1d</b> | F432I    | 99                      | 82(+)                              |
| 11    | <b>1e</b> | F432I    | 99                      | 85(+)                              |
| 12    | <b>1a</b> | L435G    | 99                      | 70( <i>S</i> )                     |
| 13    | <b>1b</b> | L435G    | 99                      | 28( <i>S</i> )                     |
| 14    | <b>1c</b> | L435G    | 99                      | 70( <i>R</i> )                     |
| 15    | <b>1d</b> | L435G    | 83                      | 35(+)                              |
| 16    | <b>1a</b> | L435A    | 99                      | 62( <i>S</i> )                     |
| 17    | <b>1b</b> | L435A    | 99                      | 31( <i>S</i> )                     |
| 18    | <b>1c</b> | L435A    | 99                      | 60( <i>R</i> )                     |
| 19    | <b>1d</b> | L435A    | 99                      | 30(-)                              |
| 20    | <b>1e</b> | L435A    | 99                      | 98(+)                              |

<sup>[a]</sup> The whole cell screening experiments are described in Experiment section. <sup>[b, c]</sup> Determined by chiral GC. <sup>[c]</sup> The absolute configuration was confirmed by comparison with the literature<sup>3-4</sup>.

**Table S3.** 435X CHMO<sub>Acineto</sub> Mutants as Catalysts in the Desymmetrization of Prochiral Cyclohexanones **1d**<sup>[a]</sup>

| entry | variants | conv.(%) <sup>[b]</sup> | ee <sub>p</sub> (%) <sup>[c]</sup> |
|-------|----------|-------------------------|------------------------------------|
| 1     | L435C    | 99                      | 40(-)                              |
| 2     | L435D    | <3                      | -                                  |
| 3     | L435E    | 6                       | 4(-)                               |
| 4     | L435F    | <3                      | -                                  |
| 5     | L435H    | 93                      | 40(+)                              |
| 6     | L435K    | <3                      | -                                  |
| 7     | L435N    | <3                      | -                                  |
| 8     | L435P    | 16                      | 66(-)                              |
| 9     | L435Q    | <3                      | -                                  |
| 10    | L435R    | <3                      | -                                  |
| 11    | L435S    | 99                      | 38(-)                              |
| 12    | L435T    | 44                      | 22(-)                              |
| 13    | L435Y    | 22                      | 89(+)                              |

<sup>[a]</sup> The whole cell screening experiments are described in Experiment section. <sup>[b, c]</sup> Determined by chiral GC. <sup>[c]</sup> The absolute configuration was confirmed by comparison with the literature<sup>3-4</sup>.

**Table S4.** Double CHMO<sub>Acineto</sub> Mutants as Catalysts in the Desymmetrization of Prochiral Cyclohexanones **1**<sup>[a]</sup>

| entry | substrate | variants    | conv.(%) <sup>[b]</sup> | ee <sub>p</sub> (%) <sup>[c]</sup> |
|-------|-----------|-------------|-------------------------|------------------------------------|
| 1     | <b>1a</b> | F432I/L435A | 99                      | 20( <i>R</i> )                     |
| 2     | <b>1a</b> | F432I/L435G | 99                      | 17( <i>S</i> )                     |
| 3     | <b>1b</b> | F432I/L435A | 99                      | 73( <i>R</i> )                     |
| 4     | <b>1b</b> | F432I/L435G | 99                      | 55( <i>R</i> )                     |
| 5     | <b>1c</b> | F432I/L435A | 99                      | 94( <i>R</i> )                     |
| 6     | <b>1d</b> | F432I/L435A | 99                      | 80(+)                              |

<sup>[a]</sup> The whole cell screening experiments are described in Experiment section. <sup>[b, c]</sup> Determined by chiral GC. <sup>[c]</sup> The absolute configuration was confirmed by comparison with the literature<sup>3-4</sup>.

**Table S5.** Triple CHMO<sub>Acineto</sub> Mutants as Catalysts in the Desymmetrization of Prochiral Cyclohexanones **1**<sup>[a]</sup>

| entry | substrate | variants          | conv.(%) <sup>[b]</sup> | ee <sub>p</sub> (%) <sup>[c]</sup> |
|-------|-----------|-------------------|-------------------------|------------------------------------|
| 1     | <b>1b</b> | F432I/L435A/T433A | 99                      | 29( <i>R</i> )                     |
| 2     | <b>1b</b> | F432I/L435A/T433V | 99                      | 89( <i>R</i> )                     |
| 3     | <b>1b</b> | F432I/L435A/T433M | 99                      | 85( <i>R</i> )                     |
| 4     | <b>1b</b> | F432I/L435A/T433I | 99                      | 85( <i>R</i> )                     |

<sup>[a]</sup> The whole cell screening experiments are described in Experiment section. <sup>[b, c]</sup> Determined by chiral GC. <sup>[c]</sup> The absolute configuration was confirmed by comparison with the literature<sup>3-4</sup>.



**Table S6.** The Amplified Reaction of Substrate **1a-1e** by the WT and the Best Mutants in Biphasic System<sup>[a]</sup>

| entry | variants          | substrate | M/mmol | conv./% <sup>[b]</sup> | ee <sub>p</sub> % <sup>[c]</sup> | yield/% <sup>[d]</sup> |
|-------|-------------------|-----------|--------|------------------------|----------------------------------|------------------------|
| 1     | WT                | <b>1a</b> | 6.75   | 99                     | 99( <i>S</i> )                   | 74                     |
| 2     | WT                | <b>1b</b> | 5.25   | 99                     | 98( <i>S</i> )                   | 72                     |
| 3     | WT                | <b>1c</b> | 2.25   | 99                     | 94( <i>S</i> )                   | 64                     |
| 4     | L435V             | <b>1d</b> | 2.40   | 99                     | 99(-)                            | 65                     |
| 5     | WT                | <b>1e</b> | 2.40   | 99                     | 99(-)                            | 86                     |
| 6     | F432I/L435A/T433L | <b>1a</b> | 3.90   | 99                     | 82( <i>R</i> )                   | 61                     |
| 7     | F432I/L435A/T433L | <b>1b</b> | 3.00   | 99                     | 94( <i>R</i> )                   | 67                     |
| 8     | F432I/L435G       | <b>1c</b> | 3.80   | 99                     | 98( <i>R</i> )                   | 68                     |
| 9     | F432I/L435G       | <b>1d</b> | 1.80   | 99                     | 97(-)                            | 62                     |
| 10    | L435G             | <b>1e</b> | 2.40   | 99                     | 99(+)                            | 89                     |

<sup>[a]</sup> The large-scale experiments are described in Experiment section. <sup>[b, c]</sup> Determined by chiral GC. <sup>[c]</sup> The absolute configuration was confirmed by comparison with the literature<sup>3-4</sup>. <sup>[d]</sup> Isolated yield calculated by isolation of products using column chromatography.

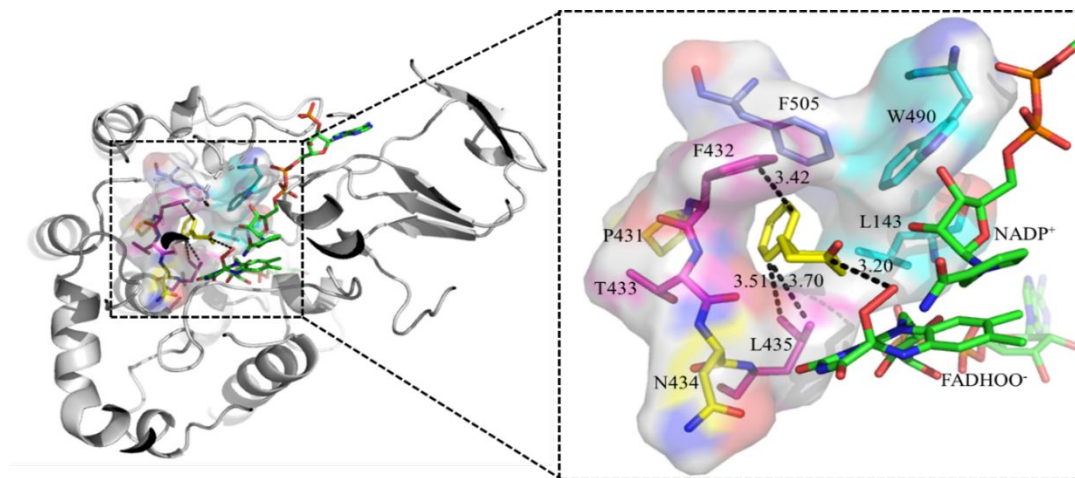

**Figure S1.** MD reference structure of WT CHMO in complex with ketone **1e**. The active center residues are represented by sticks and surfaces. Cofactors (FADHOO<sup>-</sup> and NADP<sup>+</sup>) are colored in green. The substrate is shown in yellow. The unit of the critical distance is Å. The MD reference structure corresponds to the structure with the lowest RMSD ( $\alpha$ -C atoms), relative to the average structure of the MD trajectory. The homology model based on the crystal structure of CHMO from *Rhodococcus* sp. strain HI-31 (PDB code: 3GWD)

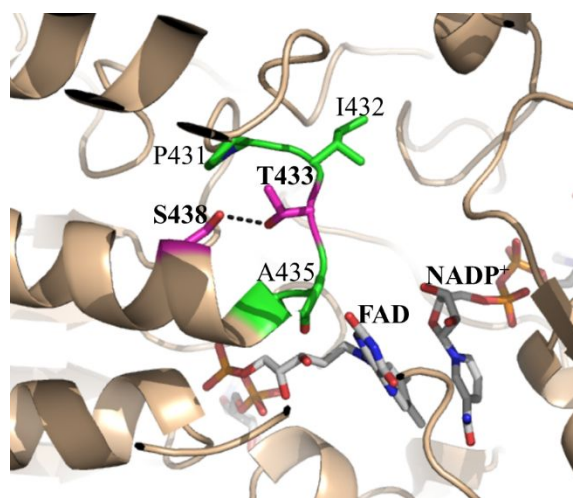

**Figure S2.** The residues T433 adjacent to the residue 432 in MD references structure of F432I/L435A are shown in magenta. Cofactors (FAD and NADP<sup>+</sup>) are colored in light gray.

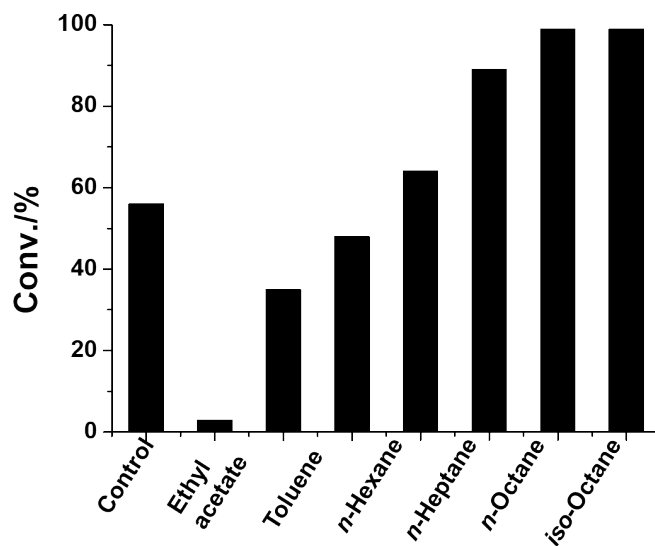

**Figure S3.** The effect of solvents in biphasic reaction.

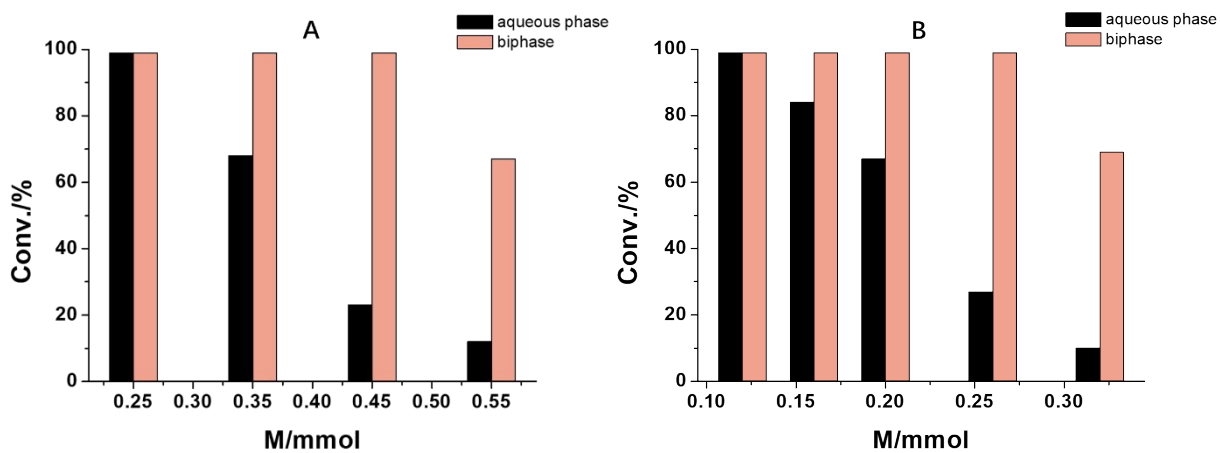

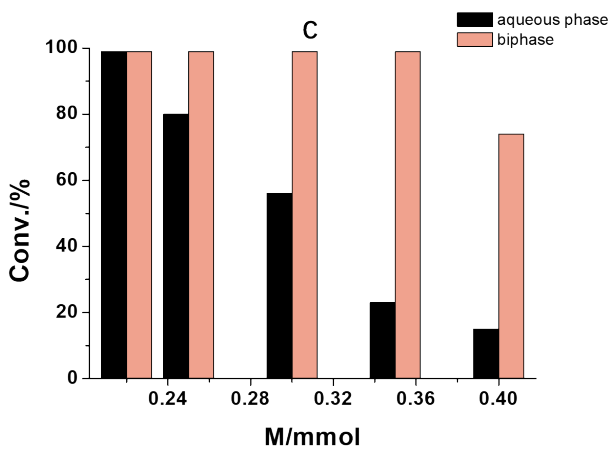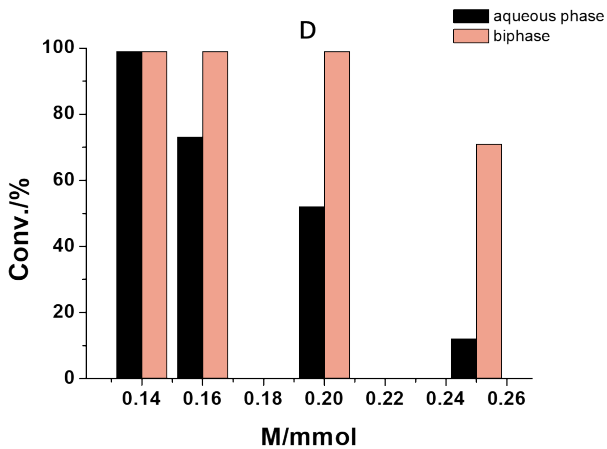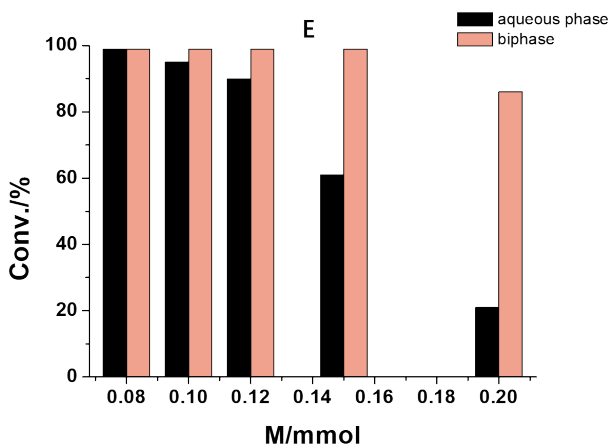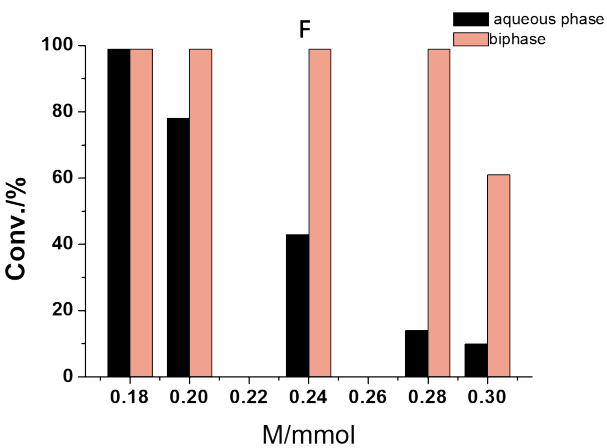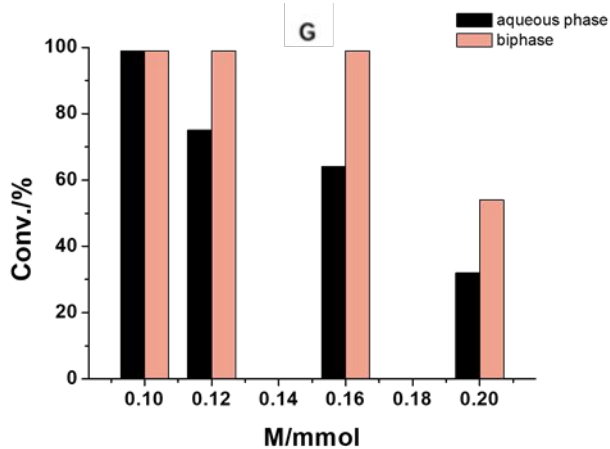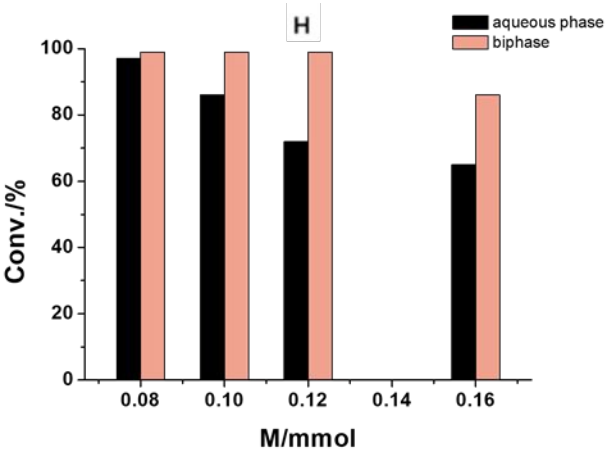

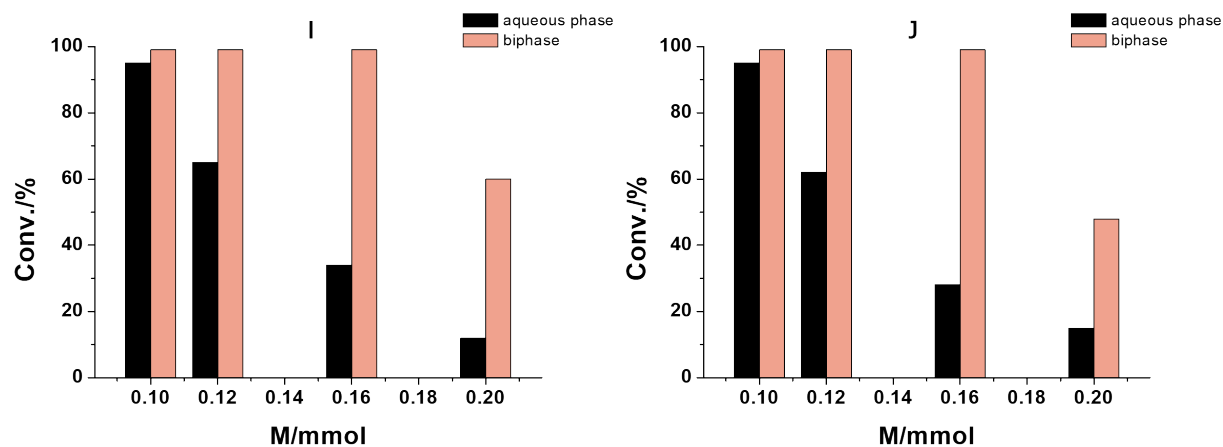

**Figure S4.** The limited mass of substrates **1a-1e** in the biphasic medium (10 mL cell culture and 30 mL *iso*-octane) in the reactions catalyzed by WT and selected mutants. (A) WT-**1a**; (B) F432I/L435A/T433L-**1a**; (C) WT-**1b**; (D) F432I/L435A/T433L-**1b**; (E) WT-**1c**; (F) F432I/L435G-**1c**; (G) WT-**1d**; (H) F432I/L435G-**1d**; (I) WT-**1e**; (J) L435G-**1e**.

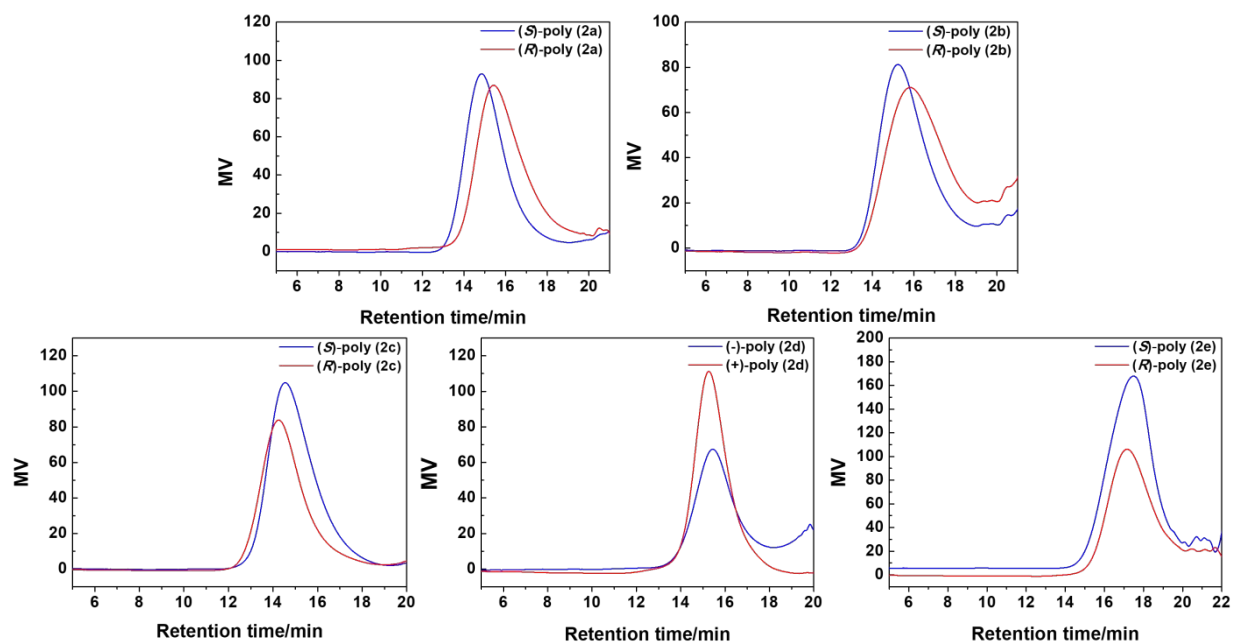

**Figure S5.** GPC traces of the obtained chiral polyesters. (A) (S)-poly(**2a**) and (R)-poly(**2a**); (B) (S)-poly(**2b**) and (R)-poly(**2b**); (C) (S)-poly(**2c**) and (R)-poly(**2c**); (D) (-)-poly(**2d**) and (+)-poly(**2d**); (E) (S)-poly(**2e**) and (R)-poly(**2e**).

### 3. $^1\text{H}$ NMR spectra of chiral polyesters.

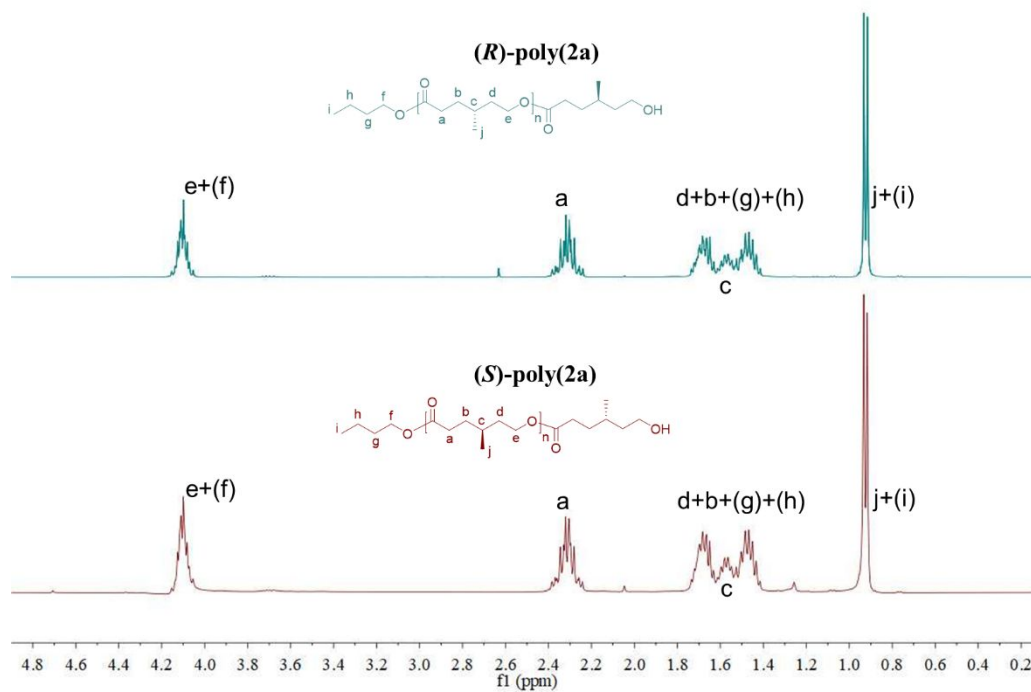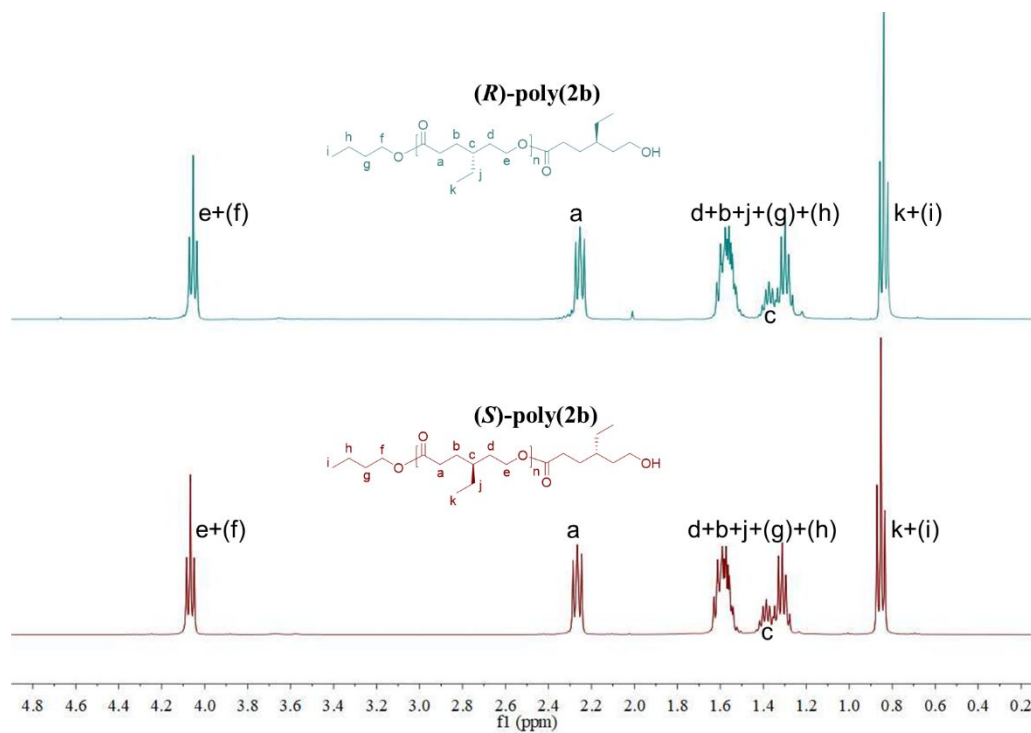

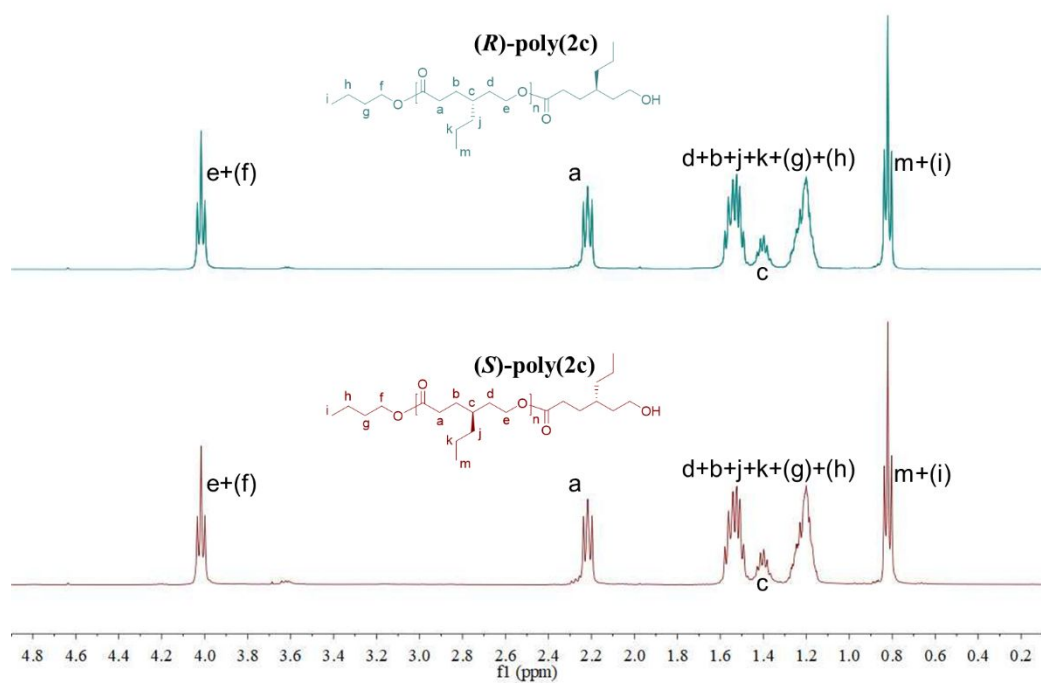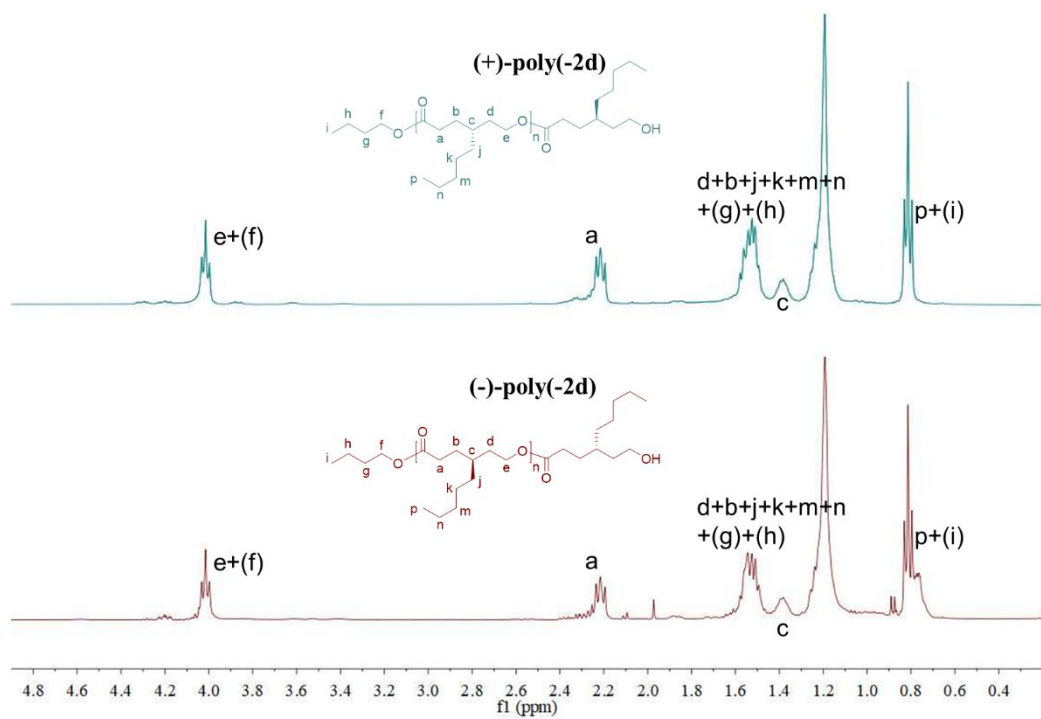



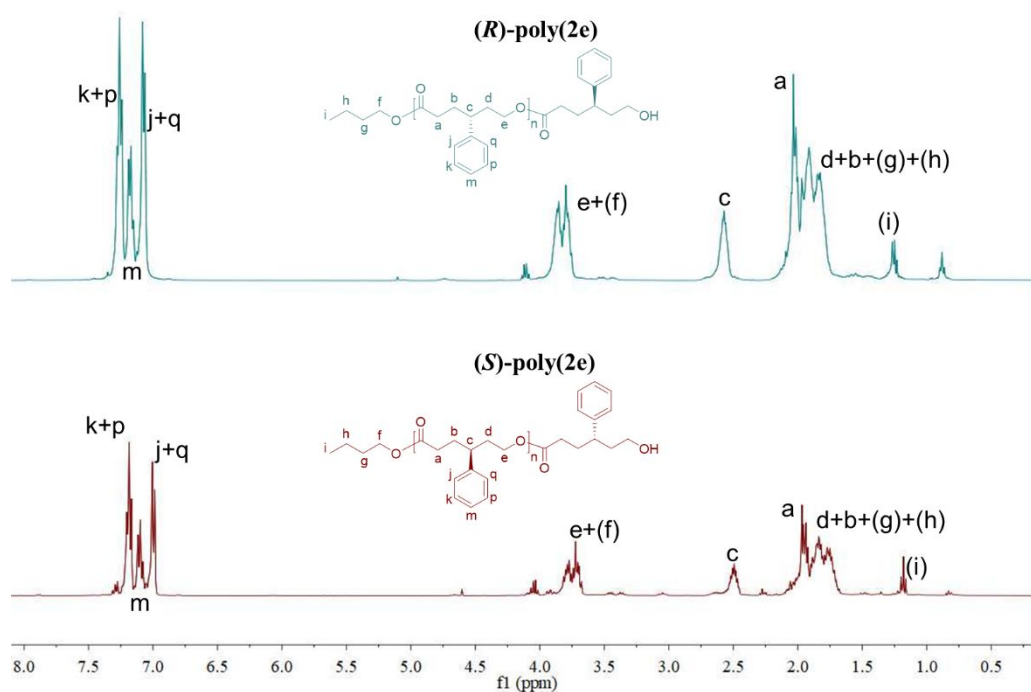

#### 4. GC data of chiral lactones and optical rotation data

**5-methyloxepan-2-one 2a:** (*S*)-enantiomer: 99% ee,  $[\alpha]_D^{20} = -50.3$  (c 0.99, CHCl<sub>3</sub>); (*R*)-enantiomer: 82% ee,  $[\alpha]_D^{20} = +31.2$  (c 0.87, CHCl<sub>3</sub>). The ee was determined by GC analysis, 100°C, 2°C/min, to 140°C.  $t_r$  (*S*) = 11.043 min,  $t_r$  (*R*) = 11.158 min.

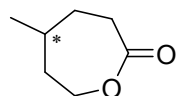

**2a**

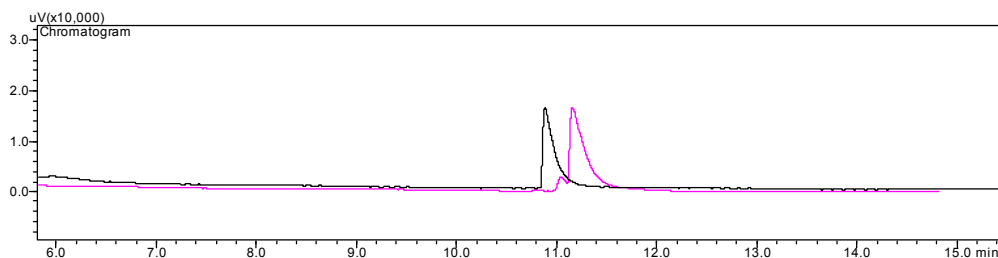

**5-ethyloxepan-2-one 2b:** (*S*)-enantiomer: 98% ee,  $[\alpha]_D^{20} = -47.4$  (c 0.98, CHCl<sub>3</sub>); (*R*)-enantiomer: 94% ee,  $[\alpha]_D^{20} = +43.4$  (c

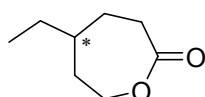

**2b**

1.13, CHCl<sub>3</sub>). The ee was determined by GC analysis, 110°C, 2°C/min, to 140°C.  $t_r(S)$  = 11.921 min,  $t_r(R)$  = 11.999 min.

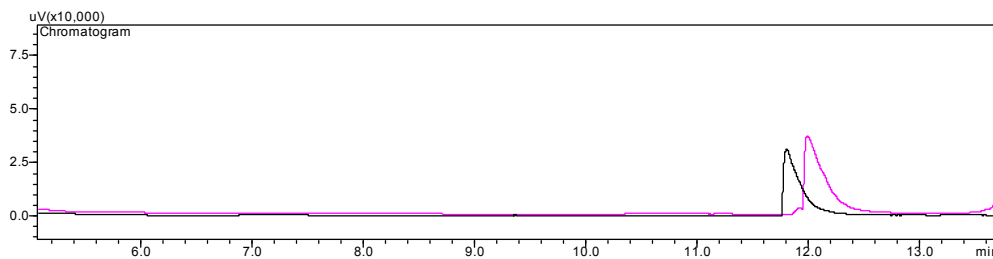

**5-propyloxepan-2-one 2c:** (*S*)-enantiomer: 94% ee,  $[\alpha]_D^{20}$  = -44.0 (c 1.23, CHCl<sub>3</sub>); (*R*)-enantiomer: 98% ee,  $[\alpha]_D^{20}$  = +46.1 (c 1.09, CHCl<sub>3</sub>). The ee was determined by GC analysis, 110°C, isotherm, 30 min, 5°C/min, 200°C, 20 min.  $t_r(S)$  = 34.491 min,  $t_r(R)$  = 35.100 min.

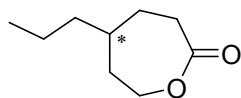

**2c**

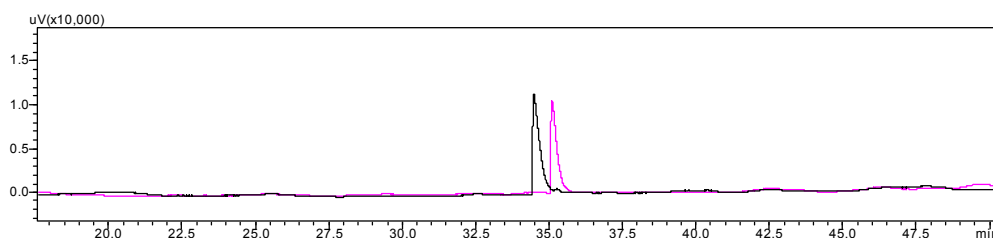

**5-pentyloxepan-2-one 2d:** (*S*)-enantiomer: 99% ee,  $[\alpha]_D^{20}$  = -33.7 (c 1.01, CHCl<sub>3</sub>); (*R*)-enantiomer: 97% ee,  $[\alpha]_D^{20}$  = +32.3 (c 1.14, CHCl<sub>3</sub>). The ee was determined by GC analysis, 110°C, 2°C/min, 170°C, 2 min.  $t_r(-)$  = 22.592 min,  $t_r(+)$  = 23.096 min.

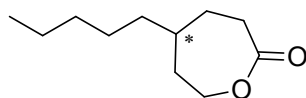

**2d**

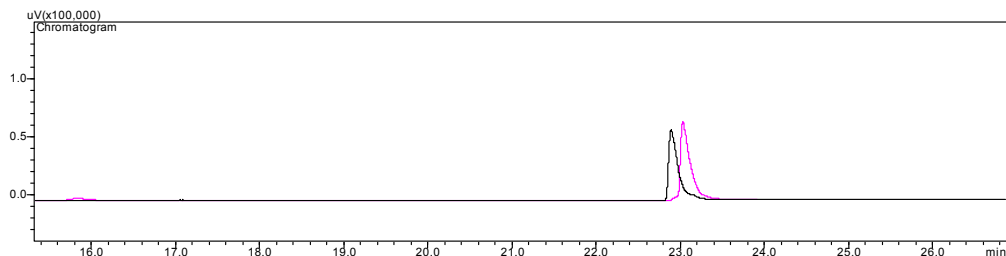

**5-phenyloxepan-2-one 2e:** (-)-enantiomer: 98% *ee*,  $[\alpha]_D^{20} = -57.0$  (c 1.03, CHCl<sub>3</sub>); (+)-enantiomer: 99% *ee*,  $[\alpha]_D^{20} = +58.6$  (c 1.18, CHCl<sub>3</sub>). The *ee* was determined by GC analysis, 110°C, 2°C/min, to 200°C, 10 min.  $t_r(-) = 39.001$  min,  $t_r(+) = 39.461$  min.

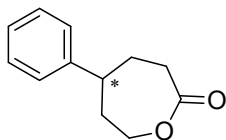

**2e**

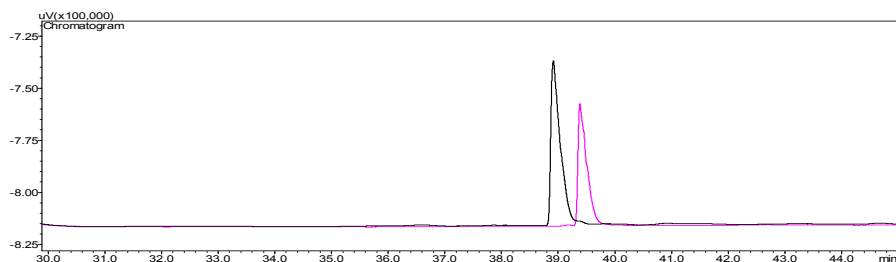

## 5. References

- (1) Hu, Y.; Wang, J.; Cen, Y.; Zheng, H.; Huang, M.; Lin, X.; Wu, Q., "Top" or "Bottom" Switches of A Cyclohexanone Monooxygenase Controlling the Enantioselectivity of the Sandwiched Substrate. *Chem. Commun.* **2019**, 55 (15), 2198-2201.
- (2) Mirza, I. A.; Yachnin, B. J.; Wang, S.; Grosse, S.; Bergeron, H.; Imura, A.; Berghuis, A. M., Crystal Structures of Cyclohexanone Monooxygenase Reveal Complex Domain Movements and A Sliding Cofactor. *J. Am. Chem. Soc.* **2009**, 131(25), 8848-8854.
- (3) Taschner, M. J.; Black, D. J.; Chen, Q. Z., The Enzymatic Baeyer-Villiger Oxidation: A Study of 4-substituted Cyclohexanones. *Tetrahedron: Asymmetry*, **1993**, 4(6), 1387-1390.

(4) Goncalves, L. C. P.; Kracher, D.; Milker, S.; Fink, M. J.; Rudroff, F.; Ludwig, R.; Bommarius, A. S.; Mihovilovic, M. D., Mutagenesis-Independent Stabilization of Class B Flavin Monooxygenases in Operation. *Adv. Synth. Catal.* **2017**, 359 (12), 2121-2131.
